# Supplementary material for: Nano-functionalized long-period fiber grating probe for disease-specific protein detection
Source: Royal Society of Chemistry journal article supplement (doi:10.1039/c7tb02406a), 2017-12-18
Supplement: c7tb02406a1.pdf [file c7tb02406a1.pdf]

## Supporting Information

### Nano-Functionalized Long-Period Fiber Grating Probe for Disease-Specific Protein Detection

Deependra Tyagi, Satyendra Kumar Mishra, Bing Zou, Congcong Lin, Ting Hao, Ge Zhang, Aiping Lu\*, Kin Seng Chiang\*, and Zhijun Yang\*

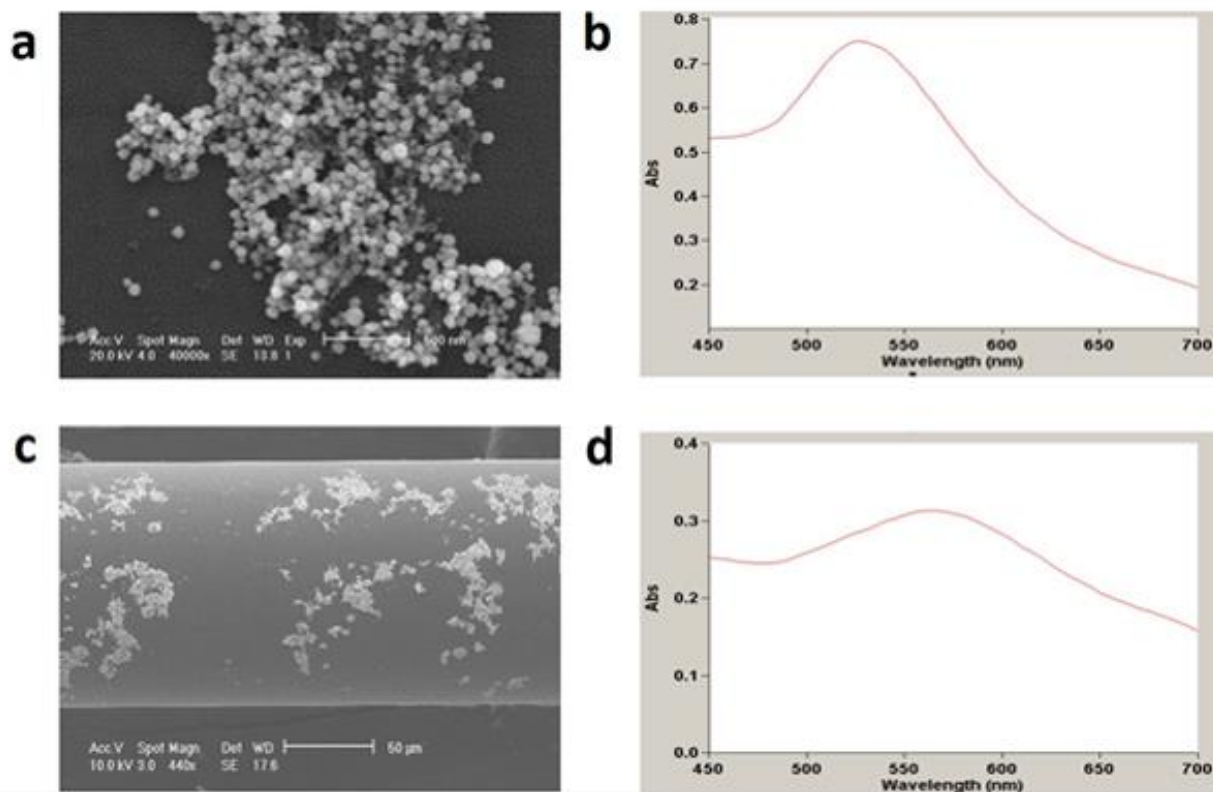

**Figure S1.** (a) TEM image and (b) UV-Vis spectra of AuNPs; (c) TEM image and (d) UV-vis spectra of the LPFG with AuNPs deposited on its surface.

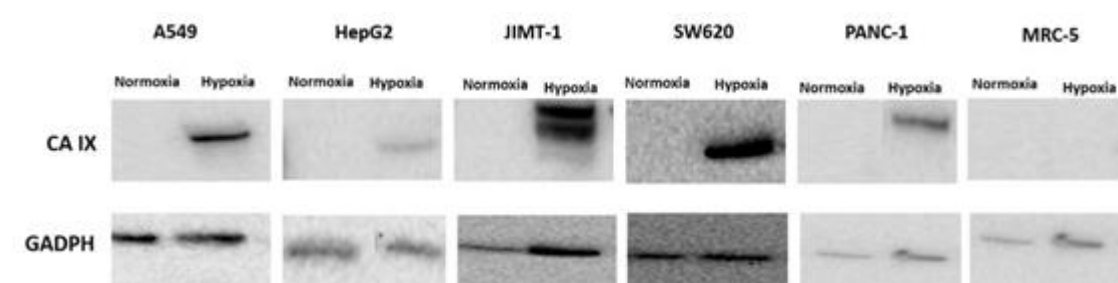

**Figure S2.** Expression analysis of CA IX in A549, HepG2, JIMT-1 SW620, PANC-1 carcinoma cell lines and MRC-5 normal fibroblast cell line under normoxic and hypoxic conditions by Western blot assay using GAPDH as loading control.
